# Supplementary material for: CircPVT1 attenuates negative regulation of NRAS by let-7 and drives cancer cells towards oncogenicity
Source: PubMed Central journal article supplement (PMC8079436; doi:10.1038/s41598-021-88539-3), 2021-04-27

# CircPVT1 attenuates negative regulation of NRAS by let-7 and drives cancer cells towards oncogenicity

Joshua Miguel C. Danac<sup>1</sup> and Reynaldo L. Garcia<sup>1,\*</sup>

<sup>1</sup>Disease Molecular Biology and Epigenetics Laboratory, National Institute of Molecular Biology and Biotechnology, University of the Philippines Diliman, Quezon City 1101, Philippines

\*Correspondence: reygarcia@mbb.upd.edu.ph

**Supplementary Table S1. Prediction of let-7 family microRNA targeting of the NRAS 3'UTR.** TargetScan Human v7.2 was used to predict binding sites for let-7 family miRNAs in the NRAS 3'UTR. Context scores are calculated based on features of the target and predicted miRNA-target binding, and weighted according to target abundance. P<sub>CT</sub> refers to the probability of conserved targeting. Predicted sites were cross-checked with microRNA.org, which gives a mirSVR downregulation score and a PhastCons conservation score, as well as with previously predicted let-7 binding sites in the NRAS 3'UTR.

| Position on 3'UTR | miRNA         | Site type | Context++ score | Context++ score percentile | Weighted context++ score | Conserved branch length | P <sub>CT</sub> | mirSVR score | PhastCons score |
|-------------------|---------------|-----------|-----------------|----------------------------|--------------------------|-------------------------|-----------------|--------------|-----------------|
| 186-192           | hsa-let-7f-5p | 7mer-m8   | -0.44           | 97                         | -0.44                    | 6.955                   | >0.99           | -0.2748      | 0.6277          |
| 186-192           | hsa-miR-4500  | 7mer-m8   | -0.47           | 97                         | -0.47                    | 6.955                   | >0.99           | —            | —               |
| 186-192           | hsa-let-7g-5p | 7mer-m8   | -0.43           | 96                         | -0.43                    | 6.955                   | >0.99           | -0.2772      | 0.6277          |
| 186-192           | hsa-let-7a-5p | 7mer-m8   | -0.43           | 96                         | -0.43                    | 6.955                   | >0.99           | -0.2772      | 0.6277          |
| 186-192           | hsa-let-7e-5p | 7mer-m8   | -0.43           | 96                         | -0.43                    | 6.955                   | >0.99           | -0.2772      | 0.6277          |
| 186-192           | hsa-miR-4458  | 7mer-m8   | -0.43           | 96                         | -0.43                    | 6.955                   | >0.99           | —            | —               |
| 186-192           | hsa-let-7d-5p | 7mer-m8   | -0.43           | 96                         | -0.43                    | 6.955                   | >0.99           | -0.2821      | 0.6277          |
| 186-192           | hsa-let-7i-5p | 7mer-m8   | -0.43           | 96                         | -0.43                    | 6.955                   | >0.99           | -0.2748      | 0.6277          |
| 186-192           | hsa-let-7c-5p | 7mer-m8   | -0.43           | 96                         | -0.43                    | 6.955                   | >0.99           | -0.2772      | 0.6277          |
| 186-192           | hsa-let-7b-5p | 7mer-m8   | -0.43           | 96                         | -0.43                    | 6.955                   | >0.99           | -0.2748      | 0.6277          |
| 186-192           | hsa-miR-98-5p | 7mer-m8   | -0.43           | 96                         | -0.43                    | 6.955                   | >0.99           | -0.2772      | 0.6277          |
| 2592-2598         | hsa-miR-4500  | 7mer-A1   | -0.30           | 89                         | -0.09                    | 4.697                   | 0.87            | —            | —               |
| 2592-2598         | hsa-miR-4458  | 7mer-A1   | -0.31           | 88                         | -0.09                    | 4.697                   | 0.87            | —            | —               |
| 2592-2598         | hsa-let-7f-5p | 7mer-A1   | -0.26           | 84                         | -0.08                    | 4.697                   | 0.87            | -0.0288      | 0.5874          |
| 2592-2598         | hsa-let-7d-5p | 7mer-A1   | -0.27           | 84                         | -0.08                    | 4.697                   | 0.87            | -0.0288      | 0.5874          |
| 2592-2598         | hsa-let-7e-5p | 7mer-A1   | -0.24           | 82                         | -0.08                    | 4.697                   | 0.87            | -0.0288      | 0.5874          |
| 2592-2598         | hsa-let-7c-5p | 7mer-A1   | -0.24           | 82                         | -0.08                    | 4.697                   | 0.87            | -0.0288      | 0.5874          |
| 2592-2598         | hsa-let-7b-5p | 7mer-A1   | -0.24           | 82                         | -0.08                    | 4.697                   | 0.87            | -0.0291      | 0.5874          |
| 2592-2598         | hsa-miR-98-5p | 7mer-A1   | -0.24           | 82                         | -0.08                    | 4.697                   | 0.87            | -0.0288      | 0.5874          |
| 2592-2598         | hsa-let-7i-5p | 7mer-A1   | -0.24           | 82                         | -0.08                    | 4.697                   | 0.87            | -0.0291      | 0.5874          |
| 2592-2598         | hsa-let-7g-5p | 7mer-A1   | -0.24           | 82                         | -0.08                    | 4.697                   | 0.87            | -0.0288      | 0.5874          |
| 2592-2598         | hsa-let-7a-5p | 7mer-A1   | -0.24           | 82                         | -0.08                    | 4.697                   | 0.87            | -0.0288      | 0.5874          |

**Supplementary Table S2. Prediction of let-7 family microRNA targeting of circPVT1.** RNAhybrid was used to predict binding sites for let-7 family miRNAs in the circPVT1 sequence. Top five binding sites for each let-7 miRNA were predicted according to minimum free energy (mfe) of hybridization. Based on the results, the top putative let-7 binding sites (highlighted gray) were mapped in Figure 1A.

| Position on circPVT1 | miRNA         | MFE (kcal/mol) | Position on circPVT1 | miRNA         | MFE (kcal/mol) | Position on circPVT1 | miRNA         | MFE (kcal/mol) |
|----------------------|---------------|----------------|----------------------|---------------|----------------|----------------------|---------------|----------------|
| 41                   | hsa-miR-98-5p | -15.6          | 144                  | hsa-let-7b-5p | -21.1          | 264                  | hsa-let-7d-5p | -21.9          |
| 47                   | hsa-let-7g-5p | -23.6          | 152                  | hsa-let-7g-5p | -15.6          | 264                  | hsa-let-7a-5p | -19.4          |
| 47                   | hsa-let-7d-5p | -21.5          | 170                  | hsa-let-7i-5p | -18.4          | 264                  | hsa-let-7b-5p | -19.4          |
| 47                   | hsa-let-7f-5p | -21.2          | 207                  | hsa-let-7g-5p | -23.9          | 264                  | hsa-let-7c-5p | -19.4          |
| 47                   | hsa-let-7a-5p | -19.6          | 207                  | hsa-let-7d-5p | -23.7          | 268                  | hsa-let-7i-5p | -18.8          |
| 47                   | hsa-let-7e-5p | -18.7          | 207                  | hsa-let-7a-5p | -23.4          | 294                  | hsa-let-7g-5p | -17.0          |
| 47                   | hsa-let-7i-5p | -18.7          | 207                  | hsa-let-7e-5p | -23.4          | 300                  | hsa-let-7f-5p | -18.7          |
| 53                   | hsa-let-7b-5p | -19.9          | 207                  | hsa-let-7c-5p | -22.1          | 300                  | hsa-let-7a-5p | -18.1          |
| 53                   | hsa-let-7c-5p | -19.9          | 207                  | hsa-let-7i-5p | -22.1          | 300                  | hsa-let-7c-5p | -18.1          |
| 59                   | hsa-miR-98-5p | -15.1          | 207                  | hsa-let-7f-5p | -20.4          | 300                  | hsa-let-7d-5p | -18.1          |
| 82                   | hsa-let-7f-5p | -16.0          | 207                  | hsa-let-7b-5p | -19.9          | 314                  | hsa-let-7e-5p | -19.5          |
| 92                   | hsa-let-7b-5p | -19.7          | 207                  | hsa-miR-98-5p | -19.2          | 333                  | hsa-let-7f-5p | -15.7          |
| 136                  | hsa-let-7d-5p | -18.5          | 229                  | hsa-miR-98-5p | -16.4          | 341                  | hsa-let-7e-5p | -18.5          |
| 136                  | hsa-let-7a-5p | -16.8          | 257                  | hsa-miR-98-5p | -19.8          | 375                  | hsa-let-7e-5p | -20.7          |
| 144                  | hsa-let-7c-5p | -22.1          | 257                  | hsa-let-7g-5p | -16.6          | 389                  | hsa-let-7i-5p | -19.8          |

**Supplementary Figure S1. Full-length blots.** Red boxes indicate cropped portions appearing in the main figures. **a.** Blots in Figure 1c, and a replicate blot from a different trial. **b.** Blots in Figure 1i. **c.** Blots in Figure 1l. **d.** Blots in Figure 2f, and a replicate blot from a different trial. **e.** Blots in Figure 2i. **f.** Blots in Figure 3j, including a replicate blot from a different trial for E-cadherin. **g.** Blots in Figure 4i, including a replicate blot from a different trial for N-cadherin.

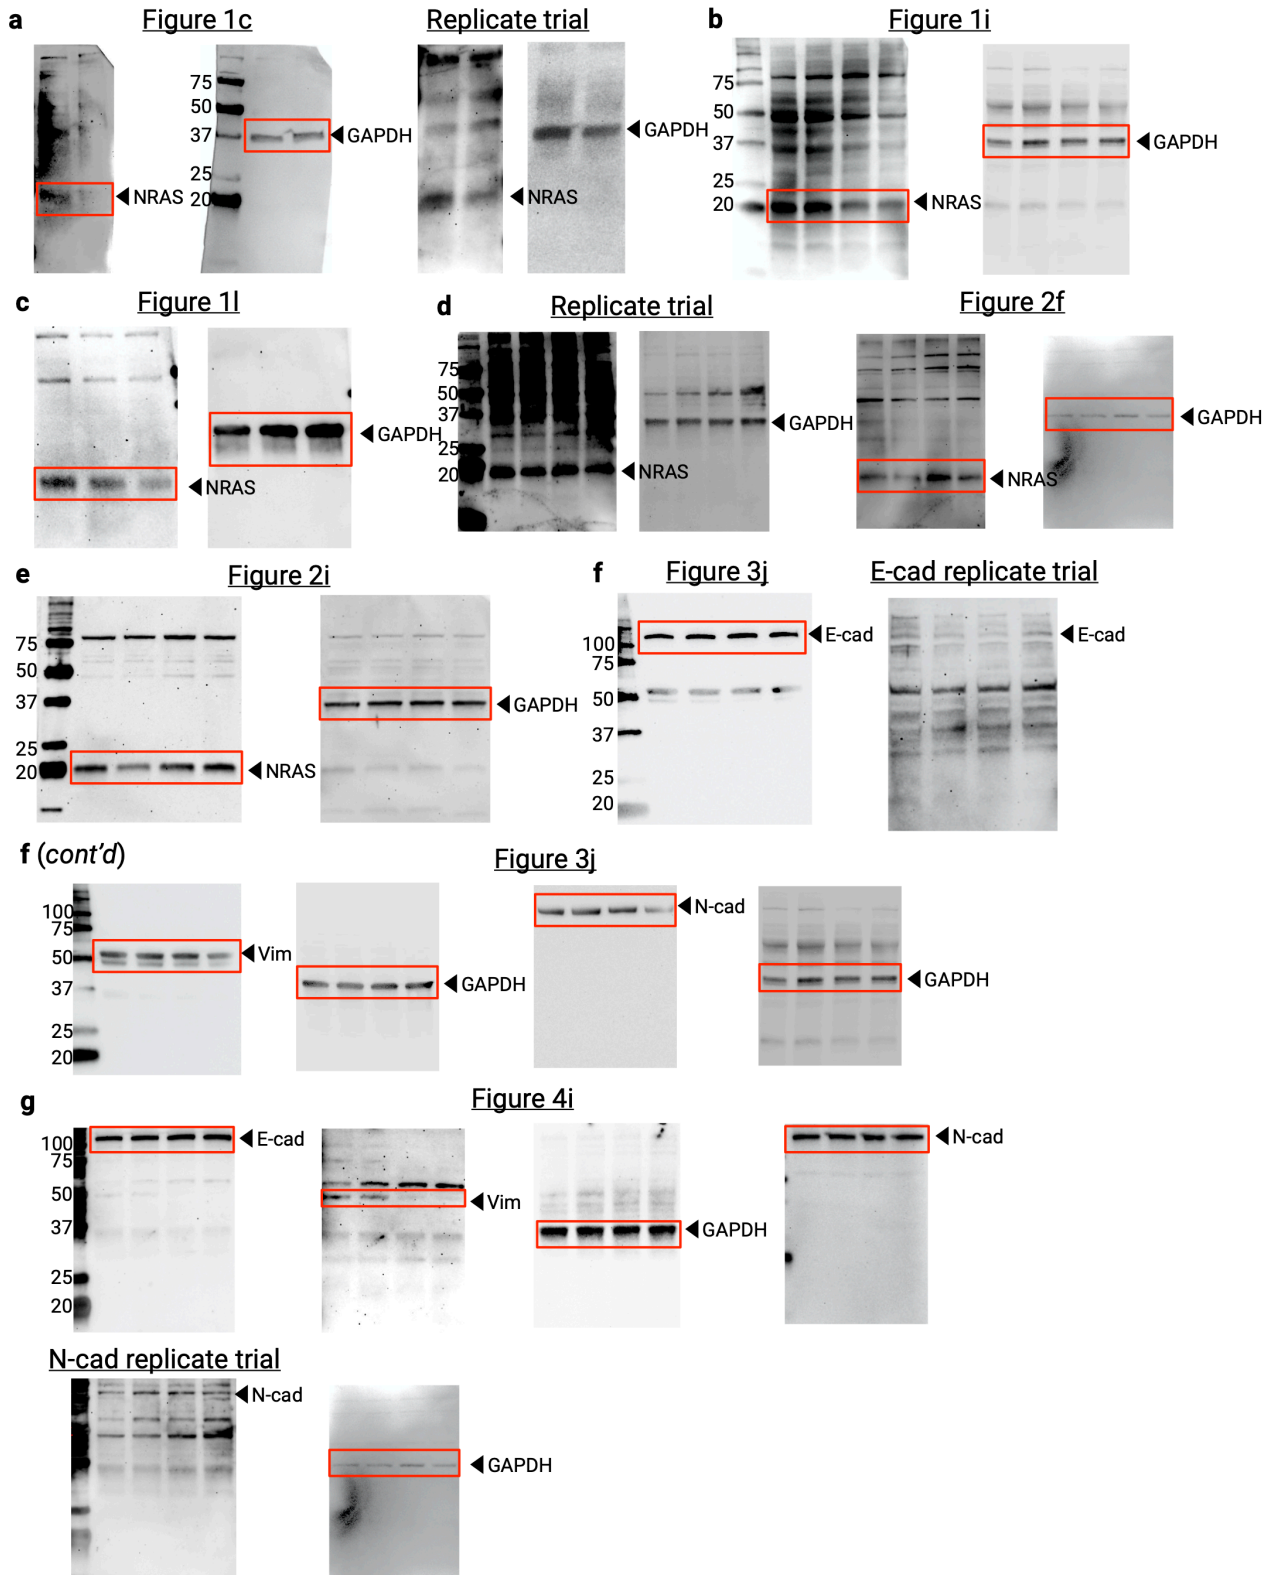

Supplement: 41598_2021_88539_MOESM1_ESM.pdf [file 41598_2021_88539_MOESM1_ESM.pdf]
